# Supplementary material
Source: bioRxiv or medRxiv preprint supplement (https://medrxiv.org/highwire/filestream/90274/field_highwire_adjunct_files/0/2020.07.13.20041632-1.pdf)
Supplement: Supplementary file [file 2020.07.13.20041632-1.pdf]

# Supplemental Tables

| Room    | Days between admission and sampling | Days between first COVID-19 positive and sampling | Days between most recent COVID-19 positive and sampling | Notes                        |
|---------|-------------------------------------|---------------------------------------------------|---------------------------------------------------------|------------------------------|
| Room 7A | 24                                  | 24                                                | 1                                                       |                              |
| Room 7B | 7                                   | >10                                               | 0 (same day)                                            | transfer from other facility |
| Room 5A | 3                                   | 3                                                 | 3                                                       |                              |
| Room 5B | 2                                   | 2                                                 | 2                                                       |                              |
| Room 5C | 4                                   | 3,2                                               | 3,2                                                     | 2 patients in this room      |
| Room 5D | 6                                   | 6                                                 | 6                                                       |                              |

**Table S1.** Metadata for rooms sampled in this study.

| <b>PCR Reaction Mix</b>                                       |          |
|---------------------------------------------------------------|----------|
| Nuclease Free Water                                           | 6.1 µL   |
| Invitrogen 2X Master Mix                                      | 12.5 µL  |
| MgSO4 (50mM)                                                  | 0.4 µl   |
| Primer/Probe Mix (IDT)* (Primers 10uM, Probe 5uM)             | 0.5 µl   |
| SuperScript III Platinum Taq                                  | 0.5 µl   |
| extracted sample RNA, nuclease free water or positive control | 5.0 µL   |
| <b>*E gene target primers and probe:</b>                      |          |
| 5'/56-FAM/ACACTAAGCC/ZEN/ATCCTTACTGCGCTTCG/3AIBkFG/-3'        | Probe    |
| 5'-ATATTGCAGCAGTACGCACACA-3'                                  | Primer 1 |
| 5'-ACAGGTACGTTAATAGTTAATAGCGT-3'                              | Primer 2 |

**Table S2.** PCR Reaction Mix used for all PCR of SARS-CoV-2 throughout the study.

| <b>Process</b>            | <b>Reagents</b>                                                                         | <b>Conditions</b>                                                                   |
|---------------------------|-----------------------------------------------------------------------------------------|-------------------------------------------------------------------------------------|
| <b>Fixing</b>             | <b>2% paraformaldehyde in 0.1M Sorenson's phosphate buffer (pH 7.2)</b>                 | <b>24 hours at 4 °C</b>                                                             |
| <b>Washing</b>            | <b>0.1M Sorenson's phosphate buffer (pH 7.2)</b>                                        | <b>3 times</b>                                                                      |
| <b>Post Fix</b>           | <b>1% aqueous solution of osmium tetroxide</b>                                          | <b>30 minutes</b>                                                                   |
| <b>Dehydration series</b> | <b>50,70, 90, 95 and 100% ethanol</b>                                                   |                                                                                     |
| <b>Embedding</b>          | <b>50:50 Embed 812 Resin and propylene oxide</b>                                        | <b>Overnight</b>                                                                    |
| <b>Final Embedding</b>    | <b>Fresh Embed 812 Resin</b>                                                            | <b>2 hours at room temperature followed by polymerization at 65 °C for 24 hours</b> |
| <b>Sectioning</b>         | <b>100 nm sections stained with 2% Uranyl Acetate followed by Reynolds Lead Citrate</b> | <b>Cut with Leica UC6 Ultracut ultramicrotome</b>                                   |

**Table S3.** Sample preparation for transmission electron microscopy.

| Room    | Sample Type  | Airborne Viral Concentration<br>TCID50/cm <sup>3</sup> of Air | Standard Deviation | Day 1<br>TCID50/mL | Day 1<br>Standard Deviation | Final Day<br>TCID50/mL | Final Day<br>Standard Deviation | Percent Increase<br>in TCID50/mL in<br>Cell Culture | Significance of<br>Calculated<br>Increase (P-<br>value) |
|---------|--------------|---------------------------------------------------------------|--------------------|--------------------|-----------------------------|------------------------|---------------------------------|-----------------------------------------------------|---------------------------------------------------------|
| Room 7A | BC251 <1 µm  | 5.50                                                          | 4.98               | 0.07               | 0.04                        | 0.08                   | 0.05                            | 23.78                                               | 0.32                                                    |
| Room 7A | BC251 1-4 µm | 0.45                                                          | 0.50               | 0.04               | 0.00                        | 0.08                   | 0.03                            | 87.49                                               | 0.08                                                    |
| Room 7A | BC251 4.1 µm | 1.57                                                          | 1.48               | 0.05               | 0.02                        | 0.10                   | 0.07                            | 81.17                                               | 0.24                                                    |
| Room 7B | BC251 <1 µm  | 5.94                                                          | 6.79               | 0.07               | 0.02                        | 0.10                   | 0.04                            | 44.57                                               | 0.03                                                    |
| Room 7B | BC251 1-4 µm | 0.40                                                          | 0.35               | 0.07               | 0.07                        | 0.03                   | 0.02                            | 17.30                                               | 0.39                                                    |
| Room 7B | BC251 4.1 µm | 2.45                                                          | 2.62               | 0.05               | 0.01                        | 0.09                   | 0.04                            | 82.25                                               | 0.13                                                    |
| Room 5A | BC251 <1 µm  | 7.41                                                          | 2.03               | 0.05               | 0.01                        | 0.08                   | 0.01                            | 66.04                                               | 0.03                                                    |
| Room 5A | BC251 1-4 µm | 0.36                                                          | 0.32               | 0.03               | 0.03                        | 0.06                   | 0.03                            | 89.99                                               | 0.18                                                    |
| Room 5A | BC251 4.1 µm | 1.34                                                          | 1.17               | 0.07               | 0.01                        | 0.06                   | 0.02                            | -23.53                                              | NA                                                      |
| Room 5B | BC251 <1 µm  | 3.73                                                          | 3.23               | 0.09               | 0.05                        | 0.14                   | 0.03                            | 45.47                                               | 0.13                                                    |
| Room 5B | BC251 1-4 µm | 0.26                                                          | 0.23               | 0.08               | 0.01                        | 0.06                   | 0.02                            | -26.55                                              | NA                                                      |
| Room 5B | BC251 4.1 µm | 1.57                                                          | 2.71               | 0.28               | 0.03                        | 0.09                   | 0.04                            | -68.55                                              | NA                                                      |
| Room 5C | BC251 <1 µm  | 4.10                                                          | 2.44               | 0.06               | 0.02                        | 0.22                   | 0.02                            | 260.65                                              | 0.01                                                    |
| Room 5C | BC251 1-4 µm | 0.58                                                          | 0.02               | 0.05               | 0.05                        | 0.09                   | 0.03                            | 79.25                                               | 0.09                                                    |
| Room 5C | BC251 4.1 µm | 1.97                                                          | 3.41               | 0.08               | 0.01                        | 0.07                   | 0.01                            | -4.77                                               | NA                                                      |
| Room 5D | BC251 <1 µm  | 1.18                                                          | 2.05               | 0.04               | 0.02                        | 0.00                   | 0.00                            | -100.00                                             | NA                                                      |
| Room 5D | BC251 1-4 µm | 0.65                                                          | 0.25               | 0.06               | 0.04                        | 0.07                   | 0.07                            | 10.65                                               | 0.45                                                    |
| Room 5D | BC251 4.1 µm | 4.00                                                          | 2.17               | 0.09               | 0.02                        | 0.09                   | 0.05                            | -0.56                                               | NA                                                      |

**Table S4.** Complete data set from Figure 1, indicating viral concentration derived from RT-PCR of raw samples, RT-PCR-derived viral concentrations from cell culture experiments and calculations on percent increase in viral titre and statistical significance, (p) as determined by a one-tailed Student's t-test.

| Room    | Small Mode |            |          | Large Mode |            |          |
|---------|------------|------------|----------|------------|------------|----------|
|         | $M$        | $\sigma_g$ | $d_{pg}$ | $M$        | $\sigma_g$ | $d_{pg}$ |
| Room 5A | 3.5E-04    | 1.3E+00    | 6.4E-01  | 4.4E-03    | 1.9E+00    | 4.2E+00  |
| Room 5B | 3.7E-04    | 1.3E+00    | 6.8E-01  | 4.5E-03    | 1.7E+00    | 3.8E+00  |
| Room 5C | 3.9E-04    | 1.2E+00    | 6.7E-01  | 6.8E-03    | 2.3E+00    | 4.3E+00  |
| Room 5D | 2.4E-04    | 1.2E+00    | 6.7E-01  | 3.1E-03    | 3.0E+00    | 3.9E+00  |
| Room 7A | 2.7E-05    | 1.3E+00    | 6.9E-01  | 2.1E-03    | 2.5E+00    | 1.1E+01  |
| Room 7B | 2.9E-04    | 1.3E+00    | 8.0E-01  | 5.8E-03    | 1.6E+00    | 2.3E+00  |

**Table S5.** Log-normal parameters calculated for the large and small modes shown in Figure 4.

|          | Location | PCR<br>(TCID50/cm <sup>3</sup> ) | Measured<br>(µg/cm <sup>3</sup> ) | Small Mode<br>(µg/cm <sup>3</sup> ) | Large Mode<br>(µg/cm <sup>3</sup> ) |
|----------|----------|----------------------------------|-----------------------------------|-------------------------------------|-------------------------------------|
| <1 µm    | Room 5A  | 7.41E+00                         | 7.95E-03                          | 4.79E-03                            | 3.11E-03                            |
|          | Room 5B  | 3.73E+00                         | 6.28E-03                          | 3.05E-03                            | 3.17E-03                            |
|          | Room 5C  | 4.10E+00                         | 4.33E-03                          | 3.63E-03                            | 6.45E-04                            |
|          | Room 5D  | 1.18E+00                         | 4.61E-03                          | 4.09E-03                            | 5.00E-04                            |
|          | Room 7A  | 5.50E+00                         | 4.00E-04                          | 3.05E-04                            | 1.34E-04                            |
|          | Room 7B  | 5.94E+00                         | 6.90E-03                          | 3.16E-03                            | 3.45E-03                            |
| 1 - 4 µm | Room 5A  | 3.57E-01                         | 4.36E-02                          | 8.50E-05                            | 3.96E-02                            |
|          | Room 5B  | 2.61E-01                         | 1.90E-02                          | 1.53E-05                            | 1.68E-02                            |
|          | Room 5C  | 5.80E-01                         | 2.88E-02                          | 2.19E-04                            | 2.71E-02                            |
|          | Room 5D  | 6.47E-01                         | 3.76E-02                          | 2.65E-04                            | 3.54E-02                            |
|          | Room 7A  | 4.53E-01                         | 5.25E-03                          | 2.30E-05                            | 4.51E-03                            |
|          | Room 7B  | 4.00E-01                         | 3.76E-02                          | 2.65E-04                            | 3.54E-02                            |
| >4.1 µm  | Room 5A  | 1.34E+00                         | 4.59E-02                          | 1.03E-23                            | 3.72E-02                            |
|          | Room 5B  | 1.57E+00                         | 1.58E-02                          | 1.39E-32                            | 1.29E-02                            |
|          | Room 5C  | 1.97E+00                         | 3.03E-02                          | 9.44E-15                            | 2.86E-02                            |
|          | Room 5D  | 4.00E+00                         | 3.13E-02                          | 6.93E-16                            | 2.80E-02                            |
|          | Room 7A  | 1.67E+00                         | 1.29E-02                          | 9.29E-17                            | 1.08E-02                            |
|          | Room 7B  | 2.74E+00                         | 3.13E-02                          | 6.93E-16                            | 2.80E-02                            |

**Table S6.** RT-PCR derived virus concentration and recovered mass concentrations for each stage of the BC251 sampler in each room included in this study.

| SARS-CoV-2 Detected in Aerosol by PCR and Cell Culture |            |              |
|--------------------------------------------------------|------------|--------------|
|                                                        | rRT-PCR    | Cell Culture |
| >4.1 $\mu\text{m}$                                     | 6:6 (100%) | 0:6 (0%)     |
| 1-4 $\mu\text{m}$                                      | 6:6 (100%) | 2:6 (33%)*   |
| < 1 $\mu\text{m}$                                      | 6:6 (100%) | 3:6 (50%)    |

**Table S7.** Number and percentage of aerosol samples where SARS-CoV-2 was detected by rRT-PCR and where replication was observed in cell culture. Samples from the 1-4  $\mu\text{m}$  stage did reach the level of statistical significance ( $0.05 < P < 0.10$ ).
